# Supplementary material for: Promiscuous specialists: Host specificity patterns among generalist louse flies
Source: PubMed Central journal article supplement (PMC8158981; doi:10.1371/journal.pone.0247698), 2021-05-27
Supplement: pone.0247698.s007.pdf [file pone.0247698.s007.pdf]

# PLOS ONE

## Promiscuous specialists: Host specificity patterns among generalist louse flies

--Manuscript Draft--

|                                                                                                                                                                                                                                                                                                                                                                                                                                                                                              |                                                                                                                                                                                                                                                                                                                                                                                                                                                                                                                                                                                                                                                                                                                                                                                                                                                                                                                                                                                                                                                                                                                                                                                                                                                                      |
|----------------------------------------------------------------------------------------------------------------------------------------------------------------------------------------------------------------------------------------------------------------------------------------------------------------------------------------------------------------------------------------------------------------------------------------------------------------------------------------------|----------------------------------------------------------------------------------------------------------------------------------------------------------------------------------------------------------------------------------------------------------------------------------------------------------------------------------------------------------------------------------------------------------------------------------------------------------------------------------------------------------------------------------------------------------------------------------------------------------------------------------------------------------------------------------------------------------------------------------------------------------------------------------------------------------------------------------------------------------------------------------------------------------------------------------------------------------------------------------------------------------------------------------------------------------------------------------------------------------------------------------------------------------------------------------------------------------------------------------------------------------------------|
| <b>Manuscript Number:</b>                                                                                                                                                                                                                                                                                                                                                                                                                                                                    | PONE-D-21-04570                                                                                                                                                                                                                                                                                                                                                                                                                                                                                                                                                                                                                                                                                                                                                                                                                                                                                                                                                                                                                                                                                                                                                                                                                                                      |
| <b>Article Type:</b>                                                                                                                                                                                                                                                                                                                                                                                                                                                                         | Research Article                                                                                                                                                                                                                                                                                                                                                                                                                                                                                                                                                                                                                                                                                                                                                                                                                                                                                                                                                                                                                                                                                                                                                                                                                                                     |
| <b>Full Title:</b>                                                                                                                                                                                                                                                                                                                                                                                                                                                                           | Promiscuous specialists: Host specificity patterns among generalist louse flies                                                                                                                                                                                                                                                                                                                                                                                                                                                                                                                                                                                                                                                                                                                                                                                                                                                                                                                                                                                                                                                                                                                                                                                      |
| <b>Short Title:</b>                                                                                                                                                                                                                                                                                                                                                                                                                                                                          | Host preference among louse flies                                                                                                                                                                                                                                                                                                                                                                                                                                                                                                                                                                                                                                                                                                                                                                                                                                                                                                                                                                                                                                                                                                                                                                                                                                    |
| <b>Corresponding Author:</b>                                                                                                                                                                                                                                                                                                                                                                                                                                                                 | Jaakko L. O. Pohjoismäki<br>University of Eastern Finland<br>Joensuu, FINLAND                                                                                                                                                                                                                                                                                                                                                                                                                                                                                                                                                                                                                                                                                                                                                                                                                                                                                                                                                                                                                                                                                                                                                                                        |
| <b>Keywords:</b>                                                                                                                                                                                                                                                                                                                                                                                                                                                                             | ectoparasite; parasite-host interaction; ecology; niche; biodiversity; specialisation                                                                                                                                                                                                                                                                                                                                                                                                                                                                                                                                                                                                                                                                                                                                                                                                                                                                                                                                                                                                                                                                                                                                                                                |
| <b>Abstract:</b>                                                                                                                                                                                                                                                                                                                                                                                                                                                                             | <p>Ectoparasites such as louse flies (Diptera: Hippoboscidae) have tendency for host specialization, which is driven by adaptation to host biology as well as competition avoidance between parasites of the same host. However, some louse fly species, especially in genera attacking birds, show wide range of suitable hosts. In the presented study, we have surveyed the current status of bird attacking louse flies in Finland to provide comprehensive host association data to analyse the ecological requirements of the generalist species. A thorough sampling of 9342 birds, representing 134 species, recovered 576 specimens of louse flies, belonging to six species: <i>Crataerina hirundinis</i>, <i>C. pallida</i>, <i>Ornithomya avicularia</i>, <i>O. chloropus</i>, <i>O. fringillina</i> and <i>Ornithophila metallica</i>. Despite some overlapping hosts, the three <i>Ornithomya</i> species showed a notable pattern in their host preference, which was influenced not only by the host size but also by the habitat and host breeding strategy. We also provide DNA barcodes for most Finnish species of Hippoboscidae, which can be used as a resource for species identification as well as metabarcoding studies in the future.</p> |
| <b>Order of Authors:</b>                                                                                                                                                                                                                                                                                                                                                                                                                                                                     | Aleksi Lehikoinen<br>Pekka Pohjola<br>Jari Valkama<br>Marko Mutanen<br>Jaakko L. O. Pohjoismäki                                                                                                                                                                                                                                                                                                                                                                                                                                                                                                                                                                                                                                                                                                                                                                                                                                                                                                                                                                                                                                                                                                                                                                      |
| <b>Additional Information:</b>                                                                                                                                                                                                                                                                                                                                                                                                                                                               |                                                                                                                                                                                                                                                                                                                                                                                                                                                                                                                                                                                                                                                                                                                                                                                                                                                                                                                                                                                                                                                                                                                                                                                                                                                                      |
| <b>Question</b>                                                                                                                                                                                                                                                                                                                                                                                                                                                                              | <b>Response</b>                                                                                                                                                                                                                                                                                                                                                                                                                                                                                                                                                                                                                                                                                                                                                                                                                                                                                                                                                                                                                                                                                                                                                                                                                                                      |
| <b>Financial Disclosure</b><br><br>Enter a financial disclosure statement that describes the sources of funding for the work included in this submission. Review the <a href="#">submission guidelines</a> for detailed requirements. View published research articles from <a href="#">PLOS ONE</a> for specific examples.<br><br>This statement is required for submission and <b>will appear in the published article</b> if the submission is accepted. Please make sure it is accurate. | The authors received no specific funding for this work.                                                                                                                                                                                                                                                                                                                                                                                                                                                                                                                                                                                                                                                                                                                                                                                                                                                                                                                                                                                                                                                                                                                                                                                                              |

**Unfunded studies**

Enter: *The author(s) received no specific funding for this work.*

**Funded studies**

Enter a statement with the following details:

- Initials of the authors who received each award
- Grant numbers awarded to each author
- The full name of each funder
- URL of each funder website
- Did the sponsors or funders play any role in the study design, data collection and analysis, decision to publish, or preparation of the manuscript?
- **NO** - Include this sentence at the end of your statement: *The funders had no role in study design, data collection and analysis, decision to publish, or preparation of the manuscript.*
- **YES** - Specify the role(s) played.

\* typeset

**Competing Interests**

Use the instructions below to enter a competing interest statement for this submission. On behalf of all authors, disclose any [competing interests](#) that could be perceived to bias this work—acknowledging all financial support and any other relevant financial or non-financial competing interests.

This statement is **required** for submission and **will appear in the published article** if the submission is accepted. Please make sure it is accurate and that any funding sources listed in your Funding Information later in the submission form are also declared in your Financial Disclosure statement.

View published research articles from [PLOS ONE](#) for specific examples.

The authors have declared that no competing interests exist.

**NO authors have competing interests**

Enter: *The authors have declared that no competing interests exist.*

**Authors with competing interests**

Enter competing interest details beginning with this statement:

*I have read the journal's policy and the authors of this manuscript have the following competing interests: [insert competing interests here]*

\* typeset

**Ethics Statement**

N/A

Enter an ethics statement for this submission. This statement is required if the study involved:

- Human participants
- Human specimens or tissue
- Vertebrate animals or cephalopods
- Vertebrate embryos or tissues
- Field research

Write "N/A" if the submission does not require an ethics statement.

General guidance is provided below. Consult the [submission guidelines](#) for detailed instructions. **Make sure that all information entered here is included in the Methods section of the manuscript.**

**Format for specific study types**

**Human Subject Research (involving human participants and/or tissue)**

- Give the name of the institutional review board or ethics committee that approved the study
- Include the approval number and/or a statement indicating approval of this research
- Indicate the form of consent obtained (written/oral) or the reason that consent was not obtained (e.g. the data were analyzed anonymously)

**Animal Research (involving vertebrate animals, embryos or tissues)**

- Provide the name of the Institutional Animal Care and Use Committee (IACUC) or other relevant ethics board that reviewed the study protocol, and indicate whether they approved this research or granted a formal waiver of ethical approval
- Include an approval number if one was obtained
- If the study involved *non-human primates*, add *additional details* about animal welfare and steps taken to ameliorate suffering
- If anesthesia, euthanasia, or any kind of animal sacrifice is part of the study, include briefly which substances and/or methods were applied

**Field Research**

Include the following details if this study involves the collection of plant, animal, or other materials from a natural setting:

- Field permit number
- Name of the institution or relevant body that granted permission

**Data Availability**

Authors are required to make all data underlying the findings described fully available, without restriction, and from the time of publication. PLOS allows rare exceptions to address legal and ethical concerns. See the [PLOS Data Policy](#) and [FAQ](#) for detailed information.

Yes - all data are fully available without restriction

A Data Availability Statement describing where the data can be found is required at submission. Your answers to this question constitute the Data Availability Statement and **will be published in the article**, if accepted.

**Important:** Stating 'data available on request from the author' is not sufficient. If your data are only available upon request, select 'No' for the first question and explain your exceptional situation in the text box.

Do the authors confirm that all data underlying the findings described in their manuscript are fully available without restriction?

**Describe where the data may be found in full sentences. If you are copying our sample text, replace any instances of XXX with the appropriate details.**

- If the data are **held or will be held in a public repository**, include URLs, accession numbers or DOIs. If this information will only be available after acceptance, indicate this by ticking the box below. For example: *All XXX files are available from the XXX database (accession number(s) XXX, XXX).*
- If the data are all contained **within the manuscript and/or Supporting Information files**, enter the following: *All relevant data are within the manuscript and its Supporting Information files.*
- If neither of these applies but you are able to provide **details of access elsewhere**, with or without limitations, please do so. For example:

*Data cannot be shared publicly because of [XXX]. Data are available from the XXX Institutional Data Access / Ethics Committee (contact via XXX) for researchers who meet the criteria for access to confidential data.*

*The data underlying the results presented in the study are available from (include the name of the third party*

All relevant data are within the manuscript and its Supporting Information files. The DNA barcodes with sample details are available from the Barcode of Life database, as a public dataset of DS-FINHIPPO at [dx.doi.org/XXXX/DS-FINHIPPO](http://dx.doi.org/XXXX/DS-FINHIPPO) (provided upon acceptance of the manuscript), including GenBank accession numbers.

|                                                                                                                                                                                                                                         |                                                                                                                                                                                  |
|-----------------------------------------------------------------------------------------------------------------------------------------------------------------------------------------------------------------------------------------|----------------------------------------------------------------------------------------------------------------------------------------------------------------------------------|
| <p><i>and contact information or URL).</i></p> <ul style="list-style-type: none"><li>• This text is appropriate if the data are owned by a third party and authors do not have permission to share the data.</li></ul> <p>* typeset</p> |                                                                                                                                                                                  |
| Additional data availability information:                                                                                                                                                                                               | Tick here if the URLs/accession numbers/DOIs will be available only after acceptance of the manuscript for publication so that we can ensure their inclusion before publication. |

# Promiscuous specialists: Host specificity patterns among generalist louse flies

Alexi Lehikoinen<sup>1\*</sup>, Pekka Pohjola<sup>2\*</sup>, Jari Valkama<sup>1\*</sup>, Marko Mutanen<sup>3</sup> and  
Jaakko L.O. Pohjoismäki<sup>2§</sup>

<sup>1</sup> The Helsinki Lab of Ornithology, Finnish Museum of Natural History, P.O. Box 17,  
00014 Helsinki University, Finland.

<sup>2</sup> Department of Environmental and Biological Sciences, University of Eastern Finland,  
Joensuu, Finland.

<sup>3</sup> Ecology and Genetics Research Unit, P.O.Box 3000, FI-90014 University of Oulu,  
Oulu, Finland.

\*Equal contribution

§Corresponding author: [Jaakko.Pohjoismaki@uef.fi](mailto:Jaakko.Pohjoismaki@uef.fi), +358-50 574 4745

## Abstract

Ectoparasites such as louse flies (Diptera: Hippoboscidae) have tendency for host specialization, which is driven by adaptation to host biology as well as competition avoidance between parasites of the same host. However, some louse fly species, especially in genera attacking birds, show wide range of suitable hosts. In the presented study, we have surveyed the current status of bird attacking louse flies in Finland to provide comprehensive host association data to analyse the ecological requirements of the generalist species. A thorough sampling of 9342 birds, representing 134 species,

25 recovered 576 specimens of louse flies, belonging to six species: *Crataerina hirundinis*,  
26 *C. pallida*, *Ornithomya avicularia*, *O. chloropus*, *O. fringillina* and *Ornithophila*  
27 *metallica*. Despite some overlapping hosts, the three *Ornithomya* species showed a  
28 notable pattern in their host preference, which was influenced not only by the host size  
29 but also by the habitat and host breeding strategy. We also provide DNA barcodes for  
30 ost Finnish species of Hippoboscidae, which can be used as a resource for species  
31 identification as well as metabarcoding studies in the future.

## 33 **Introduction**

34  
35 Parasites depend on their hosts as their principal ecological niche as well as source of  
36 the essential resources (1). Due to this intimate relationship, parasites commonly tend  
37 to specialize on the host, adapting to the host defences and ecology. Due to the selection  
38 pressures and short generation time, parasites are also prone to evolve rapidly, helping  
39 them to circumvent potential evolutionary advantages that the host has gained (2) and  
40 facilitating the specialization process. Parasitic lineages, especially endoparasites, are  
41 characterized by long branches in molecular phylogenies (e.g. (3-5)), for which reason  
42 they often constitute the “rogue” taxa in them. While several non-mutually exclusive  
43 explanations for this pattern have been suggested, for mitochondrial COI gene, this is  
44 likely at least partly explained as being an adaptation to anoxic environment (5).  
45 Additional pressure for host specialization is driven by direct or interference  
46 competition between different parasite species occupying the same host (6). For  
47 example, spatial segregation, which can allow the parasites to coexist on the same host  
48 can ultimately lead to intrahost speciation, as seen in *Dactylogyrus* gill parasites(7) and  
49 human lice (8). Host niches can also be partitioned temporally, as is the case with a



50 number flea (Siphonaptera) species on small mammals, such as *Peromyscopsylla* spp.  
51 living on e.g. bank voles (*Myodes glareolus* (Schreber)) during winter months and  
52 *Ctenophthalmus* spp. during spring/summer months (9). Parasites can also avoid  
53 competition by specializing on different aspects of the host biology. For example, the  
54 parasites can attack different developmental stages of the host, or in different biotopes  
55 or context, such as the ant decapitating scuttle flies (*Pseudacteon*, Diptera: Phoridae),  
56 where some species attack while foraging ants and some ants at the nest (10).

57  
58 Louse flies (Diptera: Hippoboscidae) are obligate ectoparasites of birds and mammals,  
59 belonging to the same superfamily (Hippoboscoidea) with tsetse flies (Glossinidae).  
60 Both families are hematophagous and viviparous. As of note, bat flies (Nycteribiinae,  
61 Streblinae) have been treated as independent families, but are in fact embedded within  
62 the other Hippoboscidae taxa (11). Adults of Hippoboscoidea species are long lived,  
63 giving birth to a full-grown or pupariated larva, one at the time but few to dozen during  
64 the female's lifetime. Of the 45 European species of Hippoboscidae, only 12 have been  
65 recorded in Finland (12) and of these, seven attack birds: *Crataerina hirundinis*  
66 (Linnaeus), *C. pallida* (Olivier), *Olfersia fumipennis* (Sahlberg), *Ornithomya*  
67 *avicularia* (Linnaeus), *O. chloropus* Bergroth, *O. fringillina* Curtis and *Ornithophila*  
68 *metallica* (Schiner). Three of the species are highly specialized, *C. hirundinis* on barn  
69 swallow (*Hirundo rustica* Linnaeus), *C. pallida* on common swift (*Apus apus*  
70 (Linnaeus)) and *O. fumipennis* on osprey (*Pandion haliaetus* (Linnaeus)), while the  
71 remaining four have relatively wide host range, each attacking dozens of bird species  
72 (13, 14).

73

74 In the presented study, we sought to survey the current status of bird attacking louse  
75 flies in Finland and provide comprehensive host association data to analyse the  
76 ecological requirements of the generalist species as well as DNA barcodes for the  
77 Finnish Hippoboscidae to facilitate their identification in the future. This required the  
78 concentrated effort from 36 bird ringers, who recorded the abundance of bird louse flies  
79 from 9342 birds, representing 134 species. A total of 576 specimens, belonging to six  
80 species of bird flies were sampled. From these *Crataerina hirundinis* and *C. pallida*,  
81 were found only on their known specific hosts, whereas *Ornithomya avicularia*, *O.*  
82 *chloropus* and *O. fringillina* were found on 68 different bird species. The sixth species,  
83 *Ornithophila metallica* was represented only by one specimen. Despite some  
84 overlapping hosts, the three *Ornithomya* species showed a notable pattern in their host  
85 preference. To explain this pattern, we were interested (i) what species' traits of hosts,  
86 could explain the variation in abundance of bird flies and (ii) do species' traits of hosts  
87 differ between different generalist bird fly species. We predict that body size of host,  
88 habitat preference, migration strategy, nest location and diet could explain the variation  
89 in species and abundance of bird flies in different host species of birds. The obtained  
90 DNA barcodes work well for separating the species and can be used as a resource for  
91 species identification as well as metabarcoding studies in the future.

92

## 93 **Materials and Methods**

94

### 95 *Data collection and filtering*

96

97 The data consisted two types of information: i) information if a bird has had bird fly or  
98 not and ii) information what bird fly species certain bird species had been carrying.

99

100 Voluntary bird ringers were collecting information on do the ringed birds have bird  
101 flies when handling the bird. The ringers also identified the age of the bird if possible  
102 (young born during the same year or older). That data was collected during years 2008-  
103 2019, but most of the data origin from 2013 onwards when new data base system was  
104 launched allowing an easy data entry. Altogether 36 ringers participated the data  
105 collection during these years and marked information from 9342 birds (134 species 72  
106 of which had bird flies; **Table S1, S2, S3** However, only some of the ringers ~~have also~~  
107 entered data from birds which did not show signs of bird flies and thus this data could  
108 not be used to study the prevalence among hosts. In addition, some bird ringers  
109 collected the bird flies from the birds in plastic vials with 90% ethanol for further  
110 investigation. This included altogether samples from 520 birds covering 62 bird  
111 species. We also determined the louse flies collected from injured birds treated in  
112 Korkeasaari Zoo in Helsinki. As these specimens were collected unsystematically, they  
113 were not included in the statistical analyses, but are presented in **Table S2** to  
114 supplement the host records of Finnish louse fly species. All the specimen records with  
115 collection, locality and host data are uploaded to the Finnish Biodiversity Info Facility  
116 database at [www.laji.fi](http://www.laji.fi).

117

118 We calculated prevalence of bird flies in the data of each ringer and excluded those  
119 ringers which had very high prevalence ( $>0.5$ ). The aim of this filtering was to remove  
120 data from the ringers who have not actively marked zero observations, which are  
121 important for prevalence analyses. After this filtering, the data included 8352  
122 observations (130 bird species 48 of which had had bird flies; **Table S1**) collected by  
123 13 more dedicated ringers. Each observation was classified into three different time

124 periods: i) late spring and early summer: May and June, iii) late summer and early  
125 autumn: July-September and iii) late autumn – early spring: October-April.

### 127 *Species determination and DNA barcoding*

129 The louse flies included in the study were determined using the relevant literature and  
130 identification keys (13, 14). The COI DNA barcode region was sequenced from one to  
131 three specimens of each of the six bird louse flies collected in this study, together with  
132 other louse fly specimens, representing all but two species found from Finland (**Table**  
133 **1**). The missing species were the sheep ked (*Melophagus ovinus* (L.)), a species that is  
134 probably close to extinction due to improved animal husbandry and veterinary  
135 practises, and the osprey specialist *Olfersia fumipennis*. DNA sequencing of the  
136 barcode fragment of mitochondrial COI gene was carried out within the framework of  
137 the national campaign of Finnish Barcode of Life (<https://www.finbol.org/>). DNA  
138 sequencing was conducted in the Centre for Biodiversity Genomics (CGB) at the  
139 University of Guelph, Canada, following protocols outlined in deWaard et al. (15). All  
140 collection, taxonomic and sequence data as well as specimen photographs were  
141 deposited in the Barcode of Life Data Systems (BOLD;(16)) and are available through  
142 the public dataset of DS-FINHIPPO at [dx.doi.org/XXXX/DS-FINHIPPO](https://dx.doi.org/XXXX/DS-FINHIPPO), including  
143 GenBank accession numbers. Calculation of sequence divergences were conducted  
144 under Kimura 2-parameter model for nucleotide substitution using BOLD Barcode Gap  
145 analysis. A Neighbor-Joining tree was built similarly under Kimura 2-parameter model.

### 147 *Statistical analyses*

149 To investigate which factors affect the abundance of bird flies in different species, we  
150 build a GLMM with Poisson distribution. The response variable was number of bird flies  
151 in a given bird individual. The explanatory variables were age of bird (1 = adult, 0 =  
152 unknown, -1 young), time period when the sampling was done (see the classification of  
153 the four time periods above), latitude coordinate of the record, breeding habitat class,  
154 migration strategy, nest site of the host and was the host predator or not (diet). Body  
155 size of birds was strongly correlated with the diet and was thus not included to the  
156 model. We used the diet as a variable because we expected that predator species would  
157 have higher number of flies, which may have been received from the prey species. The  
158 habitat classes were i) farmland, ii) forest, iii) mires and mountains, iv) scrubland and  
159 v) wetland according to Väisänen et al. (17). The reader should note that the birds were  
160 not necessarily sampled in their breeding habitats but also during the migration when  
161 the habitat type of the sampling site can differ from the breeding class. The migration  
162 strategy classes of species were i) resident, ii) short-distance migrant (wintering mainly  
163 in Europe or Mediterranean) and iii) long-distance migrant (wintering in tropical areas)  
164 according to Saurola et al. (18) and Valkama et al. (19). The nest site classes of species  
165 were i) on land, ii) openly on trees or iii) on cavities according to Cramp et al. (20).  
166 Hawks and owls were classified as predators. Latitudes of the sampling sites were  
167 centred before analyses. The explanatory variables did not show any clear collinearity  
168 (pearson correlation,  $|r| < 0.32$ ). The species was added as a random factor. Because  
169 closely related species may have similar responses due to common ancestry, we took  
170 the phylogeny of the species into account in the random structure of the model. We  
171 downloaded one phylogeny tree of the study species from [www.birdtree.org](http://www.birdtree.org) (21).  
172 The modelling was conducted using function `MCMCglmm` (22) in R version 3.6.0 (23)  
173 using 1,030,000 iterations, where first 30,000 were used for “burning in” and thinning

174 interval was 1000. We used the following priors (R-structure: V=1, nu=0.00, G-  
175 structure: V=1, nu=0.02). We investigated the trace plots of the model and found the  
176 chains randomly distributed.

177

178 In the later analyses, we investigated ~~did~~ the species traits of the host species differ  
179 between the three main generalist bird fly species (*Ornithomya avicularia*, *Ornithomya*  
180 *chloropus* and *Ornithomya fringillina*). The used traits were habitat of species (see as  
181 above), migration strategy (same as above), nest site (same as above) and body mass.  
182 The habitat classes of mires and mountains (n=3 species) and scrubland (n=3) were  
183 however merged to farmland due to very small samples sizes in these groups. These  
184 three habitats formed a general open habitat type category. Each of these four variables  
185 were tested separately. The three first categorical variables were tested using chi-square  
186 (chisq.test function in R) test based on the presence or absence of the fly in a given host  
187 species in the whole data. The body mass was tested using linear regression (lm  
188 function in R), where the log-transformed mass of the host was explanatory variable  
189 and the bird fly species was explanatory variable.

190

## 191 **Results**

192

193 We obtained systematic data of presence/absence of louse flies on 134 bird species. A  
194 total of 576 bird fly specimens were collected by the bird ringers, representing six louse  
195 fly species (**Table S1, S2, **). *Crataerina hirundinis* (N=2) and *C. pallida* (N=21),  
196 were observed only from their known hosts, *Hirundo rustica* and *Apus apus*,  
197 respectively. One *Ornithophila metallica* specimen was found on spotted flycatcher  
198 (*Muscicapa striata* (Pallas)) captured for ringing in Siikajoki, June 4, 2011. This is the

199 second record for the species from Finland. The remaining three generalist species,  
200 *Ornithomya avicularia* (N=105), *O. chloropus* (N=339) and *O. fringillina* (N=108),  
201 showed considerable variation in their host preference, totalling 67 different bird  
202 species, when the host records from Korkeasaari zoo bird shelter are taken into account  
203 **(Table S2, S3, Figure 1A)**.

204

205 The abundance these generalist louse flies (from 0 to 5) was explained by habitat of the  
206 species, predatory class, time period **(Table 2)** and latitude. Species breeding in mires  
207 and mountains had significantly fewer bird flies than species breeding in farmlands,  
208 and there was also similar tendency in birds breeding in wetlands. Predators had  
209 significantly higher number of bird flies than non-predatory species. Bird flies were  
210 more abundant in July-September period compared to May-June period, whereas  
211 abundances were smaller during October-April **(Table 2)**. Abundances of flies also  
212 increased slightly with increasing latitude **(Table 2)**.

213

214 Host species of *O. fringillina* (mean 14 g) had clearly smaller body size than hosts of  
215 *O. avicularia* (mean 311 g;  $t = -4.00$ ,  $P < 0.001$ ), but interestingly hosts of *O. chloropus*  
216 (mean 235 g) did not differ from *O. avicularia* ( $t = -0.90$ ,  $P = 0.368$ ), although the latter  
217 has been generally associated with larger hosts. The breeding habitats of hosts also  
218 differed significantly between louse fly species ( $\chi^2 = 10.99$ ,  $df = 4$ ,  $P = 0.027$ ; **Table**  
219 **3**). *O. fringillina* avoided hosts that were breeding in open habitat types, but were  
220 preferring hosts breeding in forest habitats, whereas opposite was the case in *O.*  
221 *chloropus*. All three bird fly species tend to avoid hosts breeding in wetland habitats.  
222 There was also a tendency that nest site of birds would explain host species selection  
223 of different bird fly species ( $\chi^2 = 8.38$ ,  $df = 4$ ,  $P = 0.079$ ; **Table 4**). *O. avicularia* tend

224 to have more often hosts breeding openly on trees and avoidance for species breeding  
225 on the ground, whereas opposite was the case in *O. chloropus*. *O. fringillina* showed  
226 weak preference towards host species breeding in cavities and avoidance towards  
227 species breeding openly on trees. The migratory behaviour of hosts did not differ  
228 between bird fly species ( $\chi^2 = 5.29$ ,  $df = 4$ ,  $P = 0.259$ ; **Table 5**)

229

230 Sequencing of DNA barcode fragment of COI gene indicated all included ten louse fly<sup>2</sup>,  
231 species having a highly distinct DNA barcode (**Figure 1B**). The single specimen of the  
232 sheep ked (*Melophagus ovinus*) analyzed by us failed to yield any sequence data, but  
233 public BOLD records of it indicate it also having a distinct barcode as well. Therefore,  
234 of Finnish louse flies, only rarely encountered *Olfersia fumipennis* fully lacks the  
235 barcode information in the BOLD reference library. The mean of minimum genetic  
236 divergence between the species was 8.34% and at minimum, the two species differed  
237 from each other by 6.24% (*Ornithomya hirundinis* vs. *O. fringillina*). While  
238 intraspecific variability could not be assessed for four species as represented by  
239 singletons only, it never exceeded 1%. Overall, this result suggest a wide barcode gap  
240 to exist between the Finnish louse flies. All species also were assigned to their own  
241 BINs (Barcode Index Number) as well.

## 242 **Discussion**

243

244 Host-parasite coevolution pushes parasites to specialize by adapting them to the host  
245 defence mechanisms and ecological niche (2). As an additional factor, competition  
246 between parasites of the same host can further drive niche specialization within and  
247 between hosts (1, 6). Louse flies are obligate ectoparasites, many of which show  
248 considerable specialization to single or few hosts. In general, wingless or short-winged



249 (stenopterous) species of louse flies are highly specialized, including the swift and  
250 swallow parasites of the genus *Crataerina*. In contrast, the species of *Ornithomya* have  
251 fully developed wings and many of the known species have relatively broad host range.  
252 Compared to the more specialized winged louse flies, such as *Lipoptena*, the  
253 *Ornithomya* species are also active fliers, which could be an adaptation to short lived  
254 or otherwise risky host niche. Ability to change host individual combined with  
255 flexibility with the host species is likely to be a part of risk avoidance strategy. Unlike  
256 with most other parasitic insects, such as fleas, whose larvae occupy completely  
257 different niche as detritus-feeders (9), the survival of the female louse fly and its  
258 offspring is coupled to the extreme. As the female louse fly nurtures only one larva at  
259 the time, the number of produced offspring increases with the longevity of the female  
260 and is unparallel to most insects, where the adult stage is ephemeral compared to the  
261 larval stage, and number of the offspring as well as their mortality is large.

262  
263 The purpose of our survey of bird parasitic louse flies was twofold. The first was to  
264 provide a systematic overview of the current status of the fauna, including the  
265 monitoring of potential range expansion of species under the current climate change. In  
266 comparison, in central Europe alone there are twice as many species of bird infesting  
267 louse flies than have been recorded from Finland (12, 24). We were able to sample all  
268 bird louse fly species previously known from Finland, except for the osprey specialist  
269 *Olfersia fumipennis*. Disappointingly, the only louse fly collected from an osprey was  
270 *O. avicularia* (Table S2). The last record of *O. fumipennis* from Finland is from 1884,  
271 which would qualify it as regionally extinct. However, because ospreys are not  
272 uncommon in Finland, *O. fumipennis* might be possible to rediscover by more

273 systematic search. As no conclusions about the species current status can be drawn, *O.*  
274 *fumipennis* is listed as DD in the latest Finnish Red List (25).

275

276 Interestingly, also no new species to Finland were recovered among the sampled 576  
277 louse fly specimens. For example, we checked carefully all *Ornithomya* specimens  
278 collected from barn swallows as *Ornithomya biloba* Dufour, a barn swallow specialist,  
279 is present in neighbouring Sweden (13), but these all turned out to be the common *O.*  
280 *avicularia* or *O. chloropus* (**Table S3**). Similarly, migratory birds frequently transport  
281 louse fly species with widespread southern or cosmopolitan distribution, such as  
282 *Pseudolynchia canariensis* (Macquart) or *Ornithoica turdi* (Latreille). The only such  
283 example was a single *Ornithophila metallica* specimen was found on spotted flycatcher,  
284 representing the second record for this Ethiopian-Oriental species from Finland. Some  
285 louse fly species would require targeted effort to discover. For example, the grey heron  
286 (*Ardea cinerea* Linnaeus) has become relatively common in southern Finland during  
287 the past two decades and is a host for *Icosta ardeae* (Macquart).

288

289 The second goal of the survey was to obtain comprehensive host data for the common  
290 generalist *Ornithomya* species and use it to dissect the ecological requirements of the  
291 different species. Despite the wide and overlapping host ranges among *Ornithomya*, a  
292 general pattern of host preference has been known to exist between the different species  
293 (13, 24). For example, *O. fringillina* is almost unexceptionally found only on small host  
294 birds. The question of host preference is naturally complicated by the fact that  
295 association of a mobile louse fly species on a bird species does not indicate a true host-  
296 parasite relationship. Predatory birds are likely to obtain parasites from their prey and  
297 the flies might probe several false candidates in search for their specific host. In fact,

298 this was the case in our study as well, where the predatory birds had significantly larger  
299 numbers of louse flies (**Table 2**). However, our analysis reveals some general patterns  
300 of host bird association among the Finnish *Ornithomya* species (**Tables 2, 3 and 4,**  
301 **Figure 1A**) Notably, *O. avicularia* prefers largest, tree breeding host bird species,  
302 whereas *O. chloropus* attacks similar sized ground breeding hosts in open habitats. In  
303 contrast, *O. fringillina* tend to prefer small, cavity breeding forest birds. Overall species  
304 breeding in northern open habitats had least number of flies, although the louse fly  
305 prevalence in generally increased towards north with the peak time for the flies being  
306 late summer (**Table 2**). Apart for the *Ornithophila metallica*, all observed species can  
307 be considered residential in Finland, overwintering as puparia and attacking the birds  
308 during the summer season, regardless of their migratory status (**Table 5**).

309

310 DNA barcodes work well for the louse flies and the sequence differences between the  
311 taxa are markedly big (**Figure 1B**). No cases of barcode sharing between species were  
312 detected, and despite rather scarce genetic sampling, it appears very unlikely given the  
313 wide gap between intra- and interspecific variation. This observation suggests that  
314 DNA barcoding provides as an accurate tool to identify species of louse flies. As of  
315 note, Hippoboscidae remain scarcely sampled in the Barcode of Life Database (BOLD;  
316 <https://www.boldsystems.org/>), probably because they are highly specialized and  
317 usually only found if specifically searched from their hosts. For example, at the writing  
318 of this manuscript there is only one *Ornithophila metallica* sample in the database from  
319 South Africa, which matches the Finnish specimen 98.9%. Reference DNA barcodes  
320 not only provide a determination tool for non-specialist, but also facilitate modern  
321 biodiversity surveys, such as metabarcoding studies. As an example, it was possible to  
322 detect rarely observed bat louse fly *Nycteribia kolenatii* among multiple prey species

323 of Daubenton's bat (*Myotis daubentonii* (Kuhl)) in a study analyzing the diet of the bats  
324 from fecal DNA (26). One aspect that we could not reliably assess is whether the  
325 generalist species of *Ornithomya* could be with cryptic specialists 'hiding' among them.  
326 Our sampling does not suggest this being the case, but we included only 3-6 specimens  
327 of the generalist *Ornithomya*, which is too little to assess this possibility confidently.  
328 Other studies have demonstrated putative generalist parasitic insects actually  
329 comprising many morphologically highly similar species of generalists (27-31). Further  
330 studies are likely to reveal a plenty of cases of cryptic diversity among seemingly  
331 generalist species.

332

333 We conclude that although some species can be targetedly searched, considerable effort  
334 is needed to survey louse fly fauna and most new species are found by accident. Despite  
335 their wide host ranges, the different *Ornithomya* species show clear pattern of  
336 specialization to host biology and biotope, which is likely to result from competition  
337 avoidance. DNA barcodes work well for Hippoboscidae and there are considerable  
338 distances between taxa, as is typical for parasites.

339

## 340 **Acknowledgements**

341

342 Eero Vesterinen, Thomas Lilley for Nycteriidae. Ringers. Dr. Tomi Trilar for  
343 *Hippobosca equina* specimens. We are grateful to the Finnish Barcode of Life  
344 campaign and its funders since 2011, namely the Kone Foundation, the Finnish Cultural  
345 Foundation, and the Academy of Finland (through FinBIF research infrastructure  
346 project), for making sequencing analyses possible. We are also grateful to the staff of  
347 Centre for Biodiversity Genomics (University of Guelph, Canada) for continuous

348 support with barcoding samples of the FinBOL initiative. AL received funding from  
349 Academy of Finland (grants 323527 and 329251).

## 350 **References**

- 351  
352  
353 1. Poulin R, Krasnov BR, Mouillot D, Thieltges DW. The comparative ecology  
354 and biogeography of parasites. *Philos Trans R Soc Lond B Biol Sci.*  
355 2011;366(1576):2379-90.
- 356 2. Kochin BF, Bull JJ, Antia R. Parasite evolution and life history theory. *PLoS*  
357 *Biol.* 2010;8(10):e1000524.
- 358 3. Bernt M, Bleidorn C, Braband A, Dambach J, Donath A, Fritzsche G, et al. A  
359 comprehensive analysis of bilaterian mitochondrial genomes and phylogeny.  
360 *Mol Phylogenet Evol.* 2013;69(2):352-64.
- 361 4. Heikkilä M, Mutanen M, Wahlberg N, Sihvonen P, Kaila L. Elusive ditrysian  
362 phylogeny: an account of combining systematized morphology with molecular  
363 data (Lepidoptera). *Bmc Evol Biol.* 2015;15.
- 364 5. Pentinsaari M, Salmela H, Mutanen M, Roslin T. Molecular evolution of a  
365 widely-adopted taxonomic marker (COI) across the animal tree of life. *Sci Rep-*  
366 *Uk.* 2016;6.
- 367 6. Bashey F. Within-host competitive interactions as a mechanism for the  
368 maintenance of parasite diversity. *Philos T R Soc B.* 2015;370(1675).
- 369 7. Simkova A, Morand S, Jobet E, Gelnar M, Verneau O. Molecular phylogeny of  
370 congeneric monogenean parasites (*Dactylogyrus*): a case of intrahost speciation.  
371 *Evolution.* 2004;58(5):1001-18.
- 372 8. Boutellis A, Abi-Rached L, Raoult D. The origin and distribution of human lice  
373 in the world. *Infect Genet Evol.* 2014;23:209-17.
- 374 9. Brinck-Lindroth G, Smit FGAM. The fleas (Siphonaptera) of Fennoscandia and  
375 Denmark. Leiden, the Netherlands: Brill; 2007.
- 376 10. Orr MR, Seike SH, Gilbert LE. Foraging ecology and patterns of diversification  
377 in dipteran parasitoids of fire ants in south Brazil. *Ecol Entomol.*  
378 1997;22(3):305-14.
- 379 11. Kutty SN, Pape T, Wiegmann BM, Meier R. Molecular phylogeny of the  
380 Calyptratae (Diptera: Cyclorrhapha) with an emphasis on the superfamily  
381 Oestroidea and the position of Mystacinobiidae and McAlpine's fly. *Syst*  
382 *Entomol.* 2010;35(4):614-35.
- 383 12. Pohjoismäki J, Kahanpää J. Checklist of the superfamilies Oestroidea and  
384 Hippoboscoidea of Finland (Insecta, Diptera). *Zookeys.* 2014(441):383-408.
- 385 13. Andersson H. De svenska lusflugorna [The Swedish louse-flies (Diptera:  
386 Hippoboscidae)]. *Entomologiska Tidskrift.* 1985;106:15-25.
- 387 14. Grunin KY. Family Hippoboscidae. Bei-Bienko GY, editor. New Delhi:  
388 Amerind Publishing Co. Pvt. Ltd.; 1988.
- 389 15. deWaard JR, Ivanova NV, Hajibabaei M, Hebert PD. Assembling DNA  
390 barcodes. Analytical protocols. *Methods Mol Biol.* 2008;410:275-93.
- 391 16. Ratnasingham S, Hebert PDN. BOLD: The Barcode of Life Data System  
392 ([www.barcodinglife.org](http://www.barcodinglife.org)). *Mol Ecol Notes.* 2007;7(3):355-64.

- 393 17. Väisänen RA, Lammi E, Koskimies P. Muuttuva pesimälinnusto [Distribution,  
394 numbers and population changes of Finnish breeding birds]. Otava, Keuruu.;  
395 1998.
- 396 18. Saurola P, Valkama J, Velmala W. The Finnish Bird Ringing Atlas: Finnish  
397 Museum of Natural History, Helsinki.; 2013.
- 398 19. Valkama J, Saurola P, Lehtikoinen A, Lehtikoinen E, Piha M, Sola P, et al. The  
399 Finnish Bird Ringing Atlas: Finnish Museum of Natural History, Helsinki. ;  
400 2014.
- 401 20. Cramp S. Handbook of the birds of Europe, the Middle East and North Africa.  
402 The birds of the Western Palearctic. Cramp S, editor: Oxford University Press;  
403 1977-1994.
- 404 21. Jetz W, Thomas GH, Joy JB, Hartmann K, Mooers AO. The global diversity of  
405 birds in space and time. *Nature*. 2012;491(7424):444-8.
- 406 22. Hadfield JD. MCMC Methods for Multi-Response Generalized Linear Mixed  
407 Models: The MCMCglmm R Package. *J Stat Softw*. 2010;33(2):1-22.
- 408 23. R-Core-Team. R: A language and environment for statistical computing. The R  
409 Foundation for Statistical Computing, Vienna, Austria, [https://www.R-](https://www.R-project.org)  
410 [project.org](https://www.R-project.org). 2016 [
- 411 24. Obona J, Sychra O, Gres S, Herman P, Manko P, Rohacek J, et al. A revised  
412 annotated checklist of louse flies (Diptera, Hippoboscidae) from Slovakia.  
413 *Zookeys*. 2019(862):129-52.
- 414 25. Haarto A, Kahanpää J, Kakko I, Pohjoismäki J, Winqvist K. True flies (Diptera:  
415 Brachycera). Hyvärinen E, Juslén A, Kemppainen E, Uddström A, Liukko U-M,  
416 editors. Helsinki, Finland.: Ministry of Environment, Finnish Environment  
417 Institute; 2019.
- 418 26. Vesterinen EJ, Lilley T, Laine VN, Wahlberg N. Next generation sequencing of  
419 fecal DNA reveals the dietary diversity of the widespread insectivorous predator  
420 Daubenton's Bat (*Myotis daubentonii*) in Southwestern Finland. *PLoS One*.  
421 2013;8(11):e82168.
- 422 27. Smith MA, Wood DM, Janzen DH, Hallwachs W, Hebert PDN. DNA barcodes  
423 affirm that 16 species of apparently generalist tropical parasitoid flies (Diptera,  
424 Tachinidae) are not all generalists. *P Natl Acad Sci USA*. 2007;104(12):4967-  
425 72.
- 426 28. Smith MA, Woodley NE, Janzen DH, Hallwachs W, Hebert PD. DNA barcodes  
427 reveal cryptic host-specificity within the presumed polyphagous members of a  
428 genus of parasitoid flies (Diptera: Tachinidae). *Proc Natl Acad Sci U S A*.  
429 2006;103(10):3657-62.
- 430 29. Zhang YZ, Si SL, Zheng JT, Li HL, Fang Y, Zhu CD, et al. DNA barcoding of  
431 endoparasitoid wasps in the genus *Anicetus* reveals high levels of host  
432 specificity (Hymenoptera: Encyrtidae). *Biol Control*. 2011;58(3):182-91.
- 433 30. Hamback PA, Weingartner E, Ericson L, Fors L, Cassel-Lundhagen A,  
434 Stenberg JA, et al. Bayesian species delimitation reveals generalist and  
435 specialist parasitic wasps on *Galerucella* beetles (Chrysomelidae): sorting by  
436 herbivore or plant host. *Bmc Evol Biol*. 2013;13.
- 437 31. Mutanen M, Ovaskainen O, Varkonyi G, Itämes J, Prosser SWJ, Hebert PDN,  
438 et al. Dynamics of a host-parasitoid interaction clarified by modelling and DNA  
439 sequencing. *Ecol Lett*. 2020;23(5):851-9.
- 440  
441  
442

443  
444  
445

## Tables

**Table 1** Specimens included in the DNA barcode analysis

| Subfamily     | Species                                       | Country  | N |
|---------------|-----------------------------------------------|----------|---|
| Hippoboscidae | <i>Hippobosca equina</i> (Linnaeus)           | Slovenia | 1 |
| Hippoboscidae | <i>Lipoptena cervi</i> (Linnaeus)             | Finland  | 1 |
| Hippoboscidae | <i>Crataerina hirundinis</i> (Olivier)        | Finland  | 2 |
| Hippoboscidae | <i>Crataerina pallida</i> (Linnaeus)          | Finland  | 3 |
| Hippoboscidae | <i>Ornithomya avicularia</i> (Linnaeus)       | Finland  | 6 |
| Hippoboscidae | <i>Ornithomya chloropus</i> Bergroth          | Finland  | 2 |
| Hippoboscidae | <i>Ornithomya fringillina</i> Curtis          | Finland  | 3 |
| Hippoboscidae | <i>Ornithophila metallica</i> Schiner         | Finland  | 1 |
| Nycteribiidae | <i>Nycteribia kolenatii</i> Theodor & Moscona | Finland  | 1 |
| Nycteribiidae | <i>Penicillidia monoceros</i> Speiser         | Finland  | 2 |

446  
447  
448

**Table 2.** Parameter estimates and P-values of the model explaining abundances of bird flies in different bird species. Age is age of the host. Habitat classes were compared to hosts breeding farmlands. Migration strategy was compared to long-distance migratory hosts. Nest sites were compared to hosts breeding cavities. Time period was compared to situation in May-June. Latitude was centred decimal coordinate of the data collection site. Significant ( $P < 0.05$ ) variables are bolded and P-values below 0.1 are shown in italic.

| Variable                                   | Posterior estimate (min, max) | P-value          |
|--------------------------------------------|-------------------------------|------------------|
| <b>(Intercept)</b>                         | <b>-4.57 (-6.74, -2.55)</b>   | <b>&lt;0.001</b> |
| Age (adults compared to young)             | -0.08 (-0.22, 0.05)           | 0.244            |
| Habitat, forest                            | -0.22 (-1.12, 0.58)           | 0.558            |
| <b>Habitat, mires and mountains</b>        | <b>-2.68 (-4.18, -0.96)</b>   | <b>&lt;0.001</b> |
| Habitat, scrubland                         | -0.42 (-1.95, 0.99)           | 0.550            |
| Habitat, wetland                           | -0.96 (-2.07, 0.34)           | 0.098            |
| <b>Predator (compared to non-predator)</b> | <b>2.26 (0.12, 4.28)</b>      | <b>0.042</b>     |
| Migration, resident                        | 0.23 (-0.80, 1.23)            | 0.660            |
| Migration, short-distance migrant          | -0.04 (-0.82, 0.86)           | 0.942            |
| Nest site, land                            | -0.01 (-0.99, 0.97)           | 0.958            |
| Nest site, openly on trees                 | 0.30 (-0.76, 1.43)            | 0.560            |
| <b>Time, Jul-Sep</b>                       | <b>0.89 (0.58, 1.26)</b>      | <b>&lt;0.001</b> |
| <b>Time, Oct-Apr</b>                       | <b>-1.64 (-2.32, -1.01)</b>   | <b>&lt;0.001</b> |
| <b>Latitude</b>                            | <b>0.11 (0.04, 0.17)</b>      | <b>&lt;0.001</b> |

455  
456  
457

**Table 3.** Observed and expected (in brackets) number of host species breeding in forest, open habitats and wetlands in three bird fly species.

| Species               | Forest    | Open      | Wetland |
|-----------------------|-----------|-----------|---------|
| <i>O. avicularia</i>  | 22 (21.9) | 7 (8.4)   | 6 (4.7) |
| <i>O. chloropus</i>   | 23 (28.1) | 16 (10.8) | 6 (6.0) |
| <i>O. fringillina</i> | 15 (10.0) | 0 (3.8)   | 1 (2.1) |

458

459

**Table 4.** Observed and expected (in brackets) number of host species breeding in

460

cavities, on ground and openly on trees in three bird fly species.

| Species               | Cavity   | Ground    | Trees     |
|-----------------------|----------|-----------|-----------|
| <i>O. avicularia</i>  | 7 (8.0)  | 12 (15.3) | 16 (11.7) |
| <i>O. chloropus</i>   | 8 (10.3) | 24 (19.7) | 13 (15.0) |
| <i>O. fringillina</i> | 7 (3.7)  | 6 (7.0)   | 3 (5.3)   |

461

462

**Table 5.** Observed and expected (in brackets) number of host species based on

463

migratory strategy (in three bird fly species).

| Species               | Long      | Short     | Resident |
|-----------------------|-----------|-----------|----------|
| <i>O. avicularia</i>  | 13 (13.1) | 16 (13.9) | 6 (8.0)  |
| <i>O. chloropus</i>   | 19 (16.9) | 17 (17.8) | 9(10.3)  |
| <i>O. fringillina</i> | 4 (6.0)   | 5 (6.3)   | 7 (3.7)  |

464

465

466

## Figures

467

468

**Figure 1.** Host associations and DNA barcode divergence among Finnish louse flies.

469

(A) Host associations among the three *Ornithomya* species. Only one *Ornithophila*

470

*metallica* was found in this study and *Crataerina* spp. were collected from their specific

471

hosts, as indicated in the results. (B) Neighbor-Joining tree for the species covered in

472

this study. Note that the tree demonstrates sequence differences between the taxa and

473

does not represent actual phylogeny. The barcode index number (BIN) for each taxon

474

on the right margin.



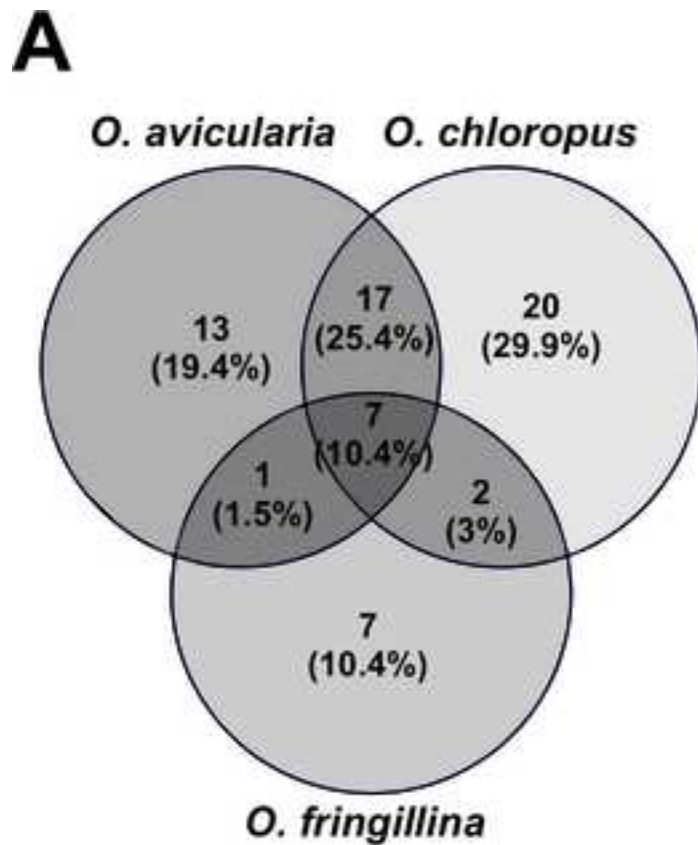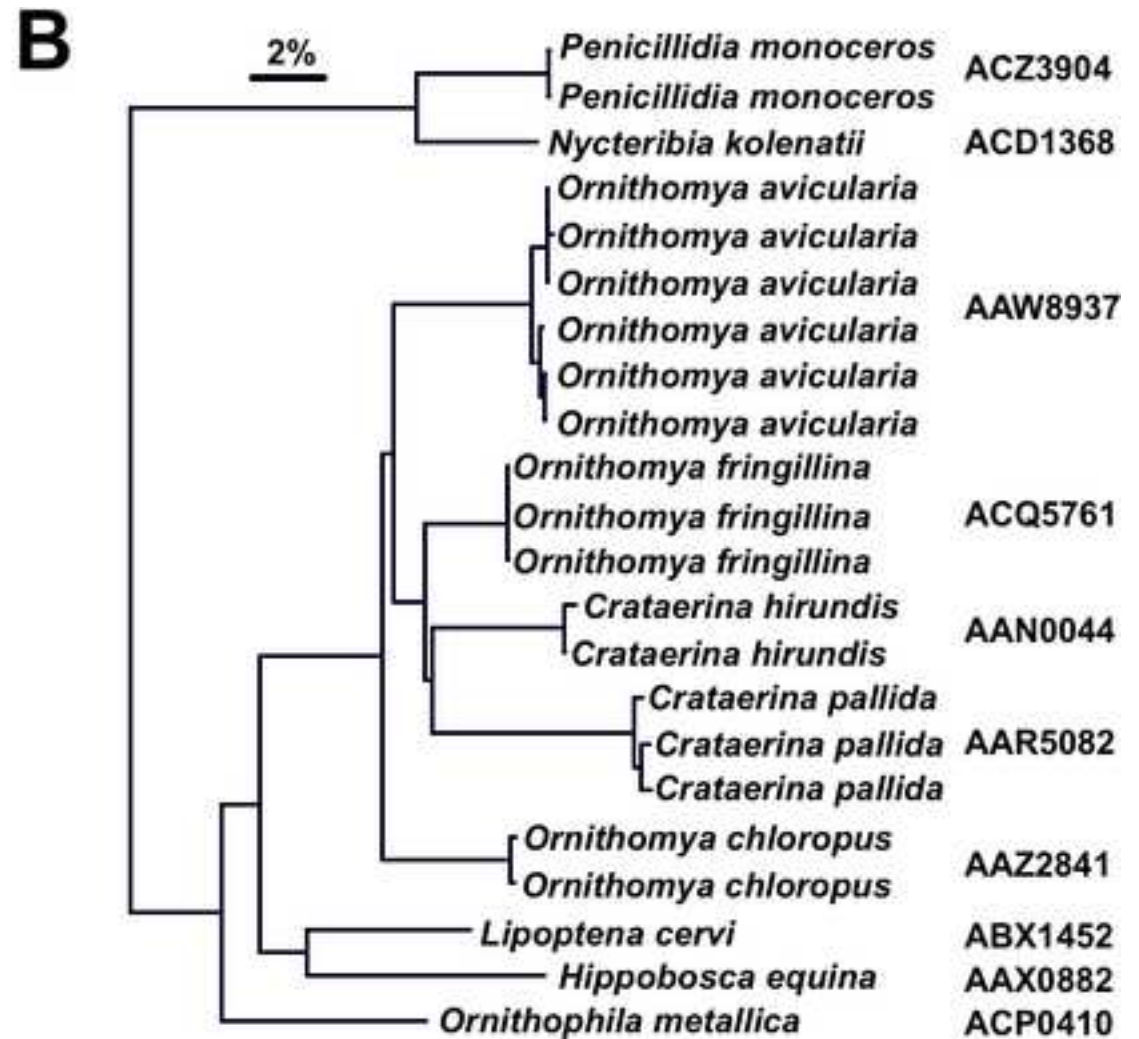

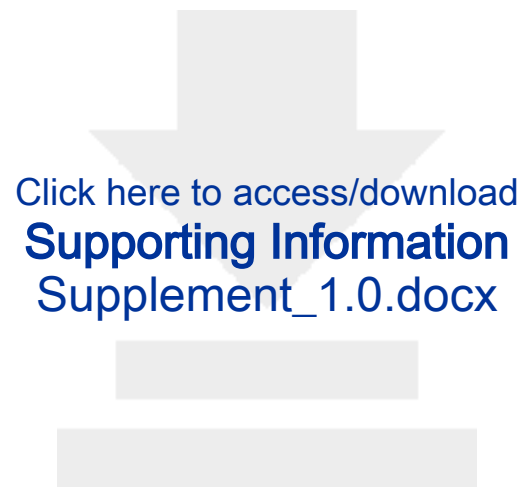

Click here to access/download  
**Supporting Information**  
Supplement\_1.0.docx
